# Supplementary material for: Influence of pathogen and focus of infection on procalcitonin values in sepsis patients with bacteremia or candidemia
Source: Springer Nature journal article supplement (doi:10.1186/s13054-018-2050-9), 2018-05-11
Supplement: MOESM1 [file 15760268]

## **Additional File 1– Involved Ethical Bodies**

- Ethics committee of the University Hospital Jena (2910–08/10)
- Ethics committee of the “Ärzttekammer Nordrhein” (2010403)
- Ethics committee of the “Ärzttekammer Westfalen-Lippe” (2010-518-b-S)
- Ethics committee of the “Landesärztekammer Baden-Württemberg” (B-F-2010-056)
- Ethics committee of the “Landesärztekammer Bayern” (7/10284)
- Ethics committee of the “Landesärztekammer Hessen” (MC 245/2010)
- Ethics committee of the “Landesärztekammer Niedersachsen” (Ar/211/2010)
- Ethics committee of the “Landesärztekammer Saarland” (195/10)
- Ethics committee of the “Landesärztekammer Sachsen” (EK-BR—51/10-1)
- Ethics committee of the Medical Faculty Leipzig (324-10-08112010)
- Ethics committee of the “Landesärztekammer Sachsen-Anhalt” (33/10)
- Ethics committee of the “Landesärztekammer Thüringen” (38831/2010/109)
- Ethics committee of the Medical Faculty Greifswald (BB 129/10)
- Ethics committee of the Medical Faculty Kiel (B 204/11)
- Ethics committee of the Medical Faculty Tübingen (556/2010BO2)
- Ethics committee of the University Ulm (295/10)
- Ethics committee of the University Witten-Herdecke (90/2010)
